# Supplementary material
Source: PubMed Central journal article supplement (PMC3253819)

Supporting Information for:

**Advanced Glycation End Products of DNA: Quantitative ESI-MS/MS determination of  $N^2$ -(1-carboxyethyl)-2'-deoxyguanosine (CEdG) in biological samples**

Timothy Synold<sup>†</sup>, Bixin Xi<sup>†</sup>, Gerald E. Wuenschell<sup>‡</sup>, Daniel Tamae<sup>‡</sup>, James L. Figarola<sup>§</sup>, Samuel Rahbar<sup>§</sup>, and John Termini<sup>‡\*</sup>

**Figure S1:** UV spectra of stock solutions of unlabeled and isotopically labeled CEdG diastereomers.

**Figure S2:** <sup>1</sup>H NMR of CEdG(A).

**Figure S3:** <sup>1</sup>H NMR of CEdG(B).

**Figure S4:** <sup>13</sup>C NMR of CEdG(A).

**Figure S5:** <sup>13</sup>C NMR of CEdG(B), “b” indicates signals arising from buffer (TEAA).

**Figure S6:** MS2 and MS3 of sodiated CEdG(A) parent ion obtained using the Thermo Finnigan LTQ-FT linear ion trap mass spectrometer.

**Figure S7:** Product ion scans for CEdG (A) and <sup>15</sup>N<sub>5</sub>-CEdG(A) at m/z 340 and 345, respectively, showing the daughter ions at m/z 224 and 229 monitored using a Micromass Quattro Ultima Triple Quadrupole Mass Spectrometer.

**Figure S8:** Observed isotopic distributions for <sup>15</sup>N<sub>5</sub>-CEdG(A) and <sup>15</sup>N<sub>5</sub>-CEdG(B) and the calculated isotopic distribution for C<sub>13</sub>H<sub>17</sub><sup>15</sup>N<sub>5</sub>NaO<sub>6</sub>. The latter was calculated using the Molecular Weight Calculator, V. 6.38, by Matthew Monroe, distributed as freeware at <http://www.alchemistmatt.com/>.

**Figure S1:** UV spectra of stock solutions of unlabeled and isotopically labeled CEdG diastereomers.

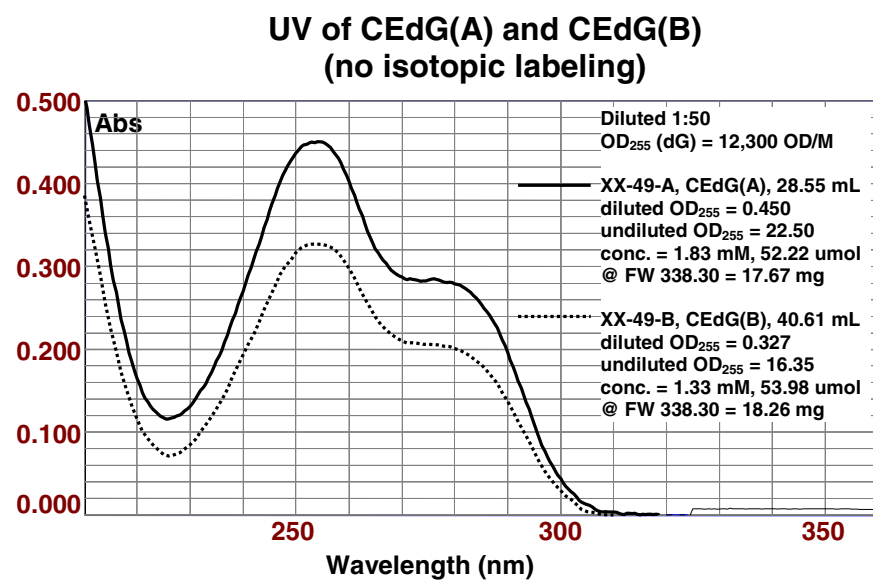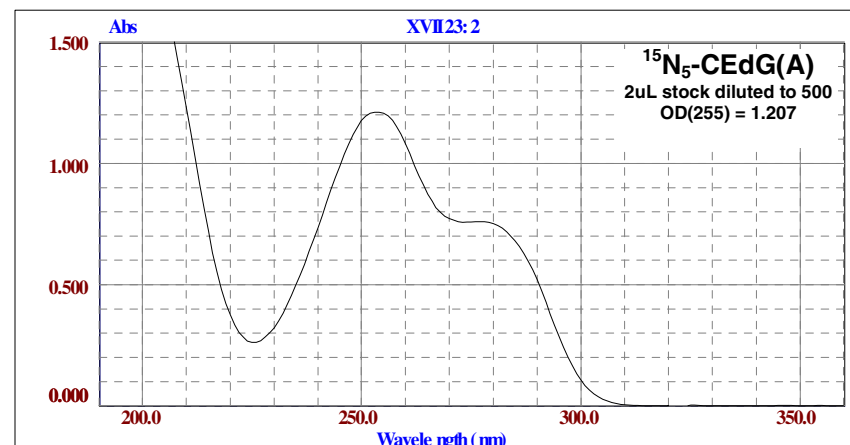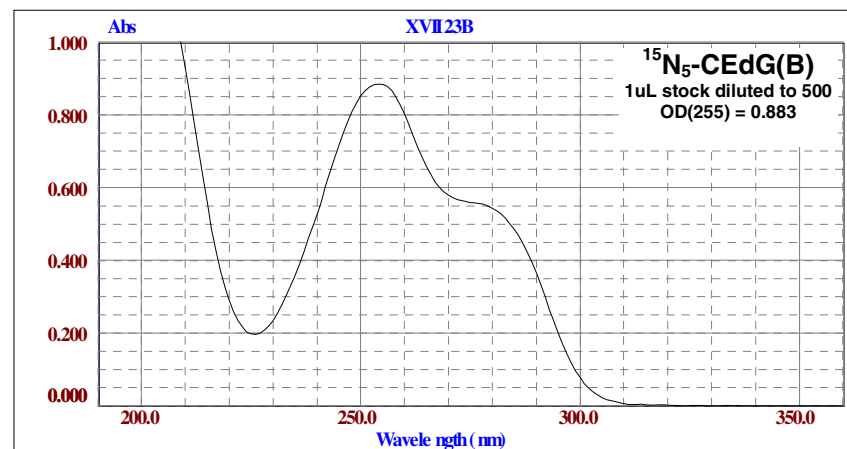

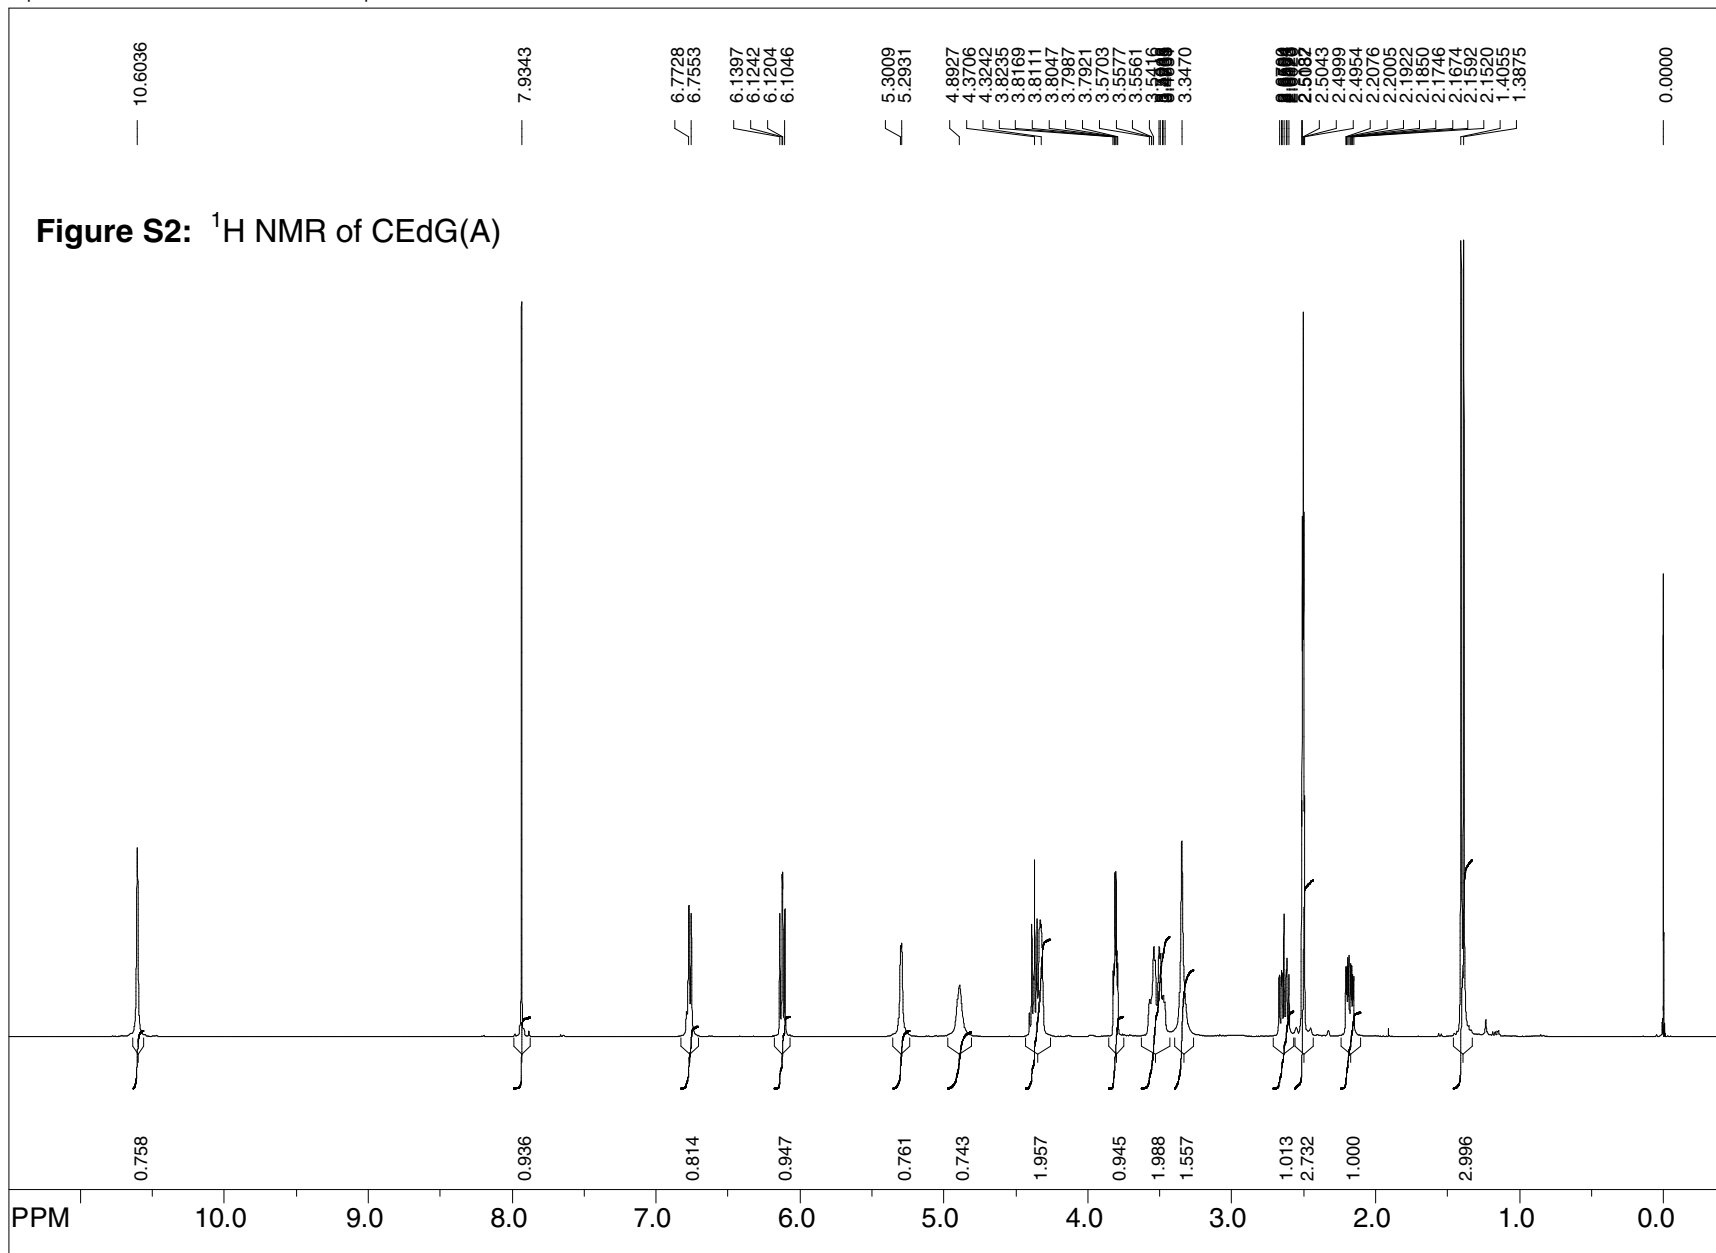

file: C:\GWFiles\Research\InstrumentationAndEquip\NMR\Flower\NMRData\GWXX16F1.fid\fid\_block# 1 exp: "s2pu"  
 transmitter freq.: 399.806855 MHz  
 time domain size: 21340 points  
 width: 5208.33 Hz = 13.027115 ppm = 0.244064 Hz/pt  
 number of scans: 512

freq. of 0 ppm: 399.804642 MHz  
 processed size: 65536 complex points  
 LB: 0.000 GB: 0.0000

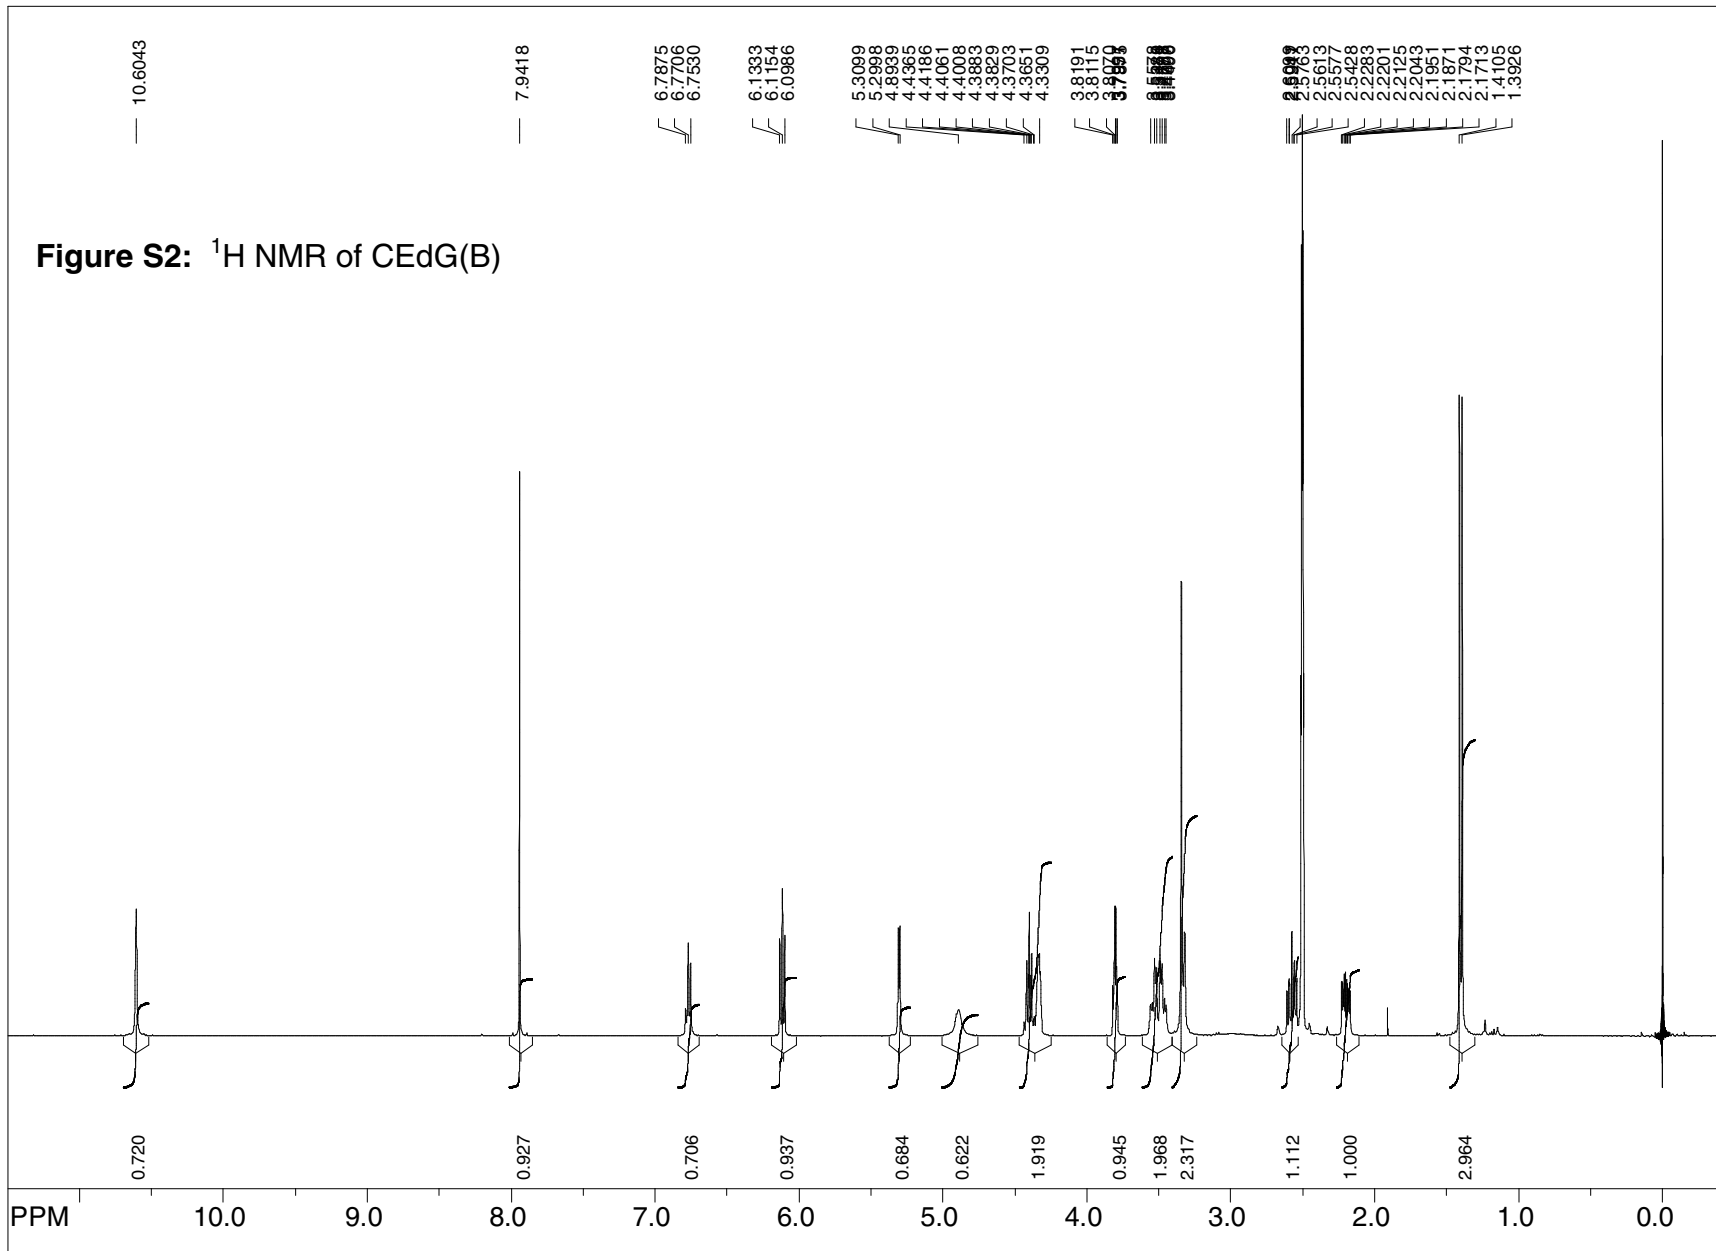

file: C:\GWFiles\Research\InstrumentationAndEquip\NMR\Flower\NMRData\GW\XX16F2.fid\fid\_block# 1 expt: "s2pu"  
 transmitter freq: 399.806855 MHz  
 time domain size: 21340 points  
 width: 5208.33 Hz = 13.027115 ppm = 0.244064 Hz/pt  
 number of scans: 512

freq. of 0 ppm: 399.804643 MHz  
 processed size: 65536 complex points  
 LB: 0.500 GB: 0.0000

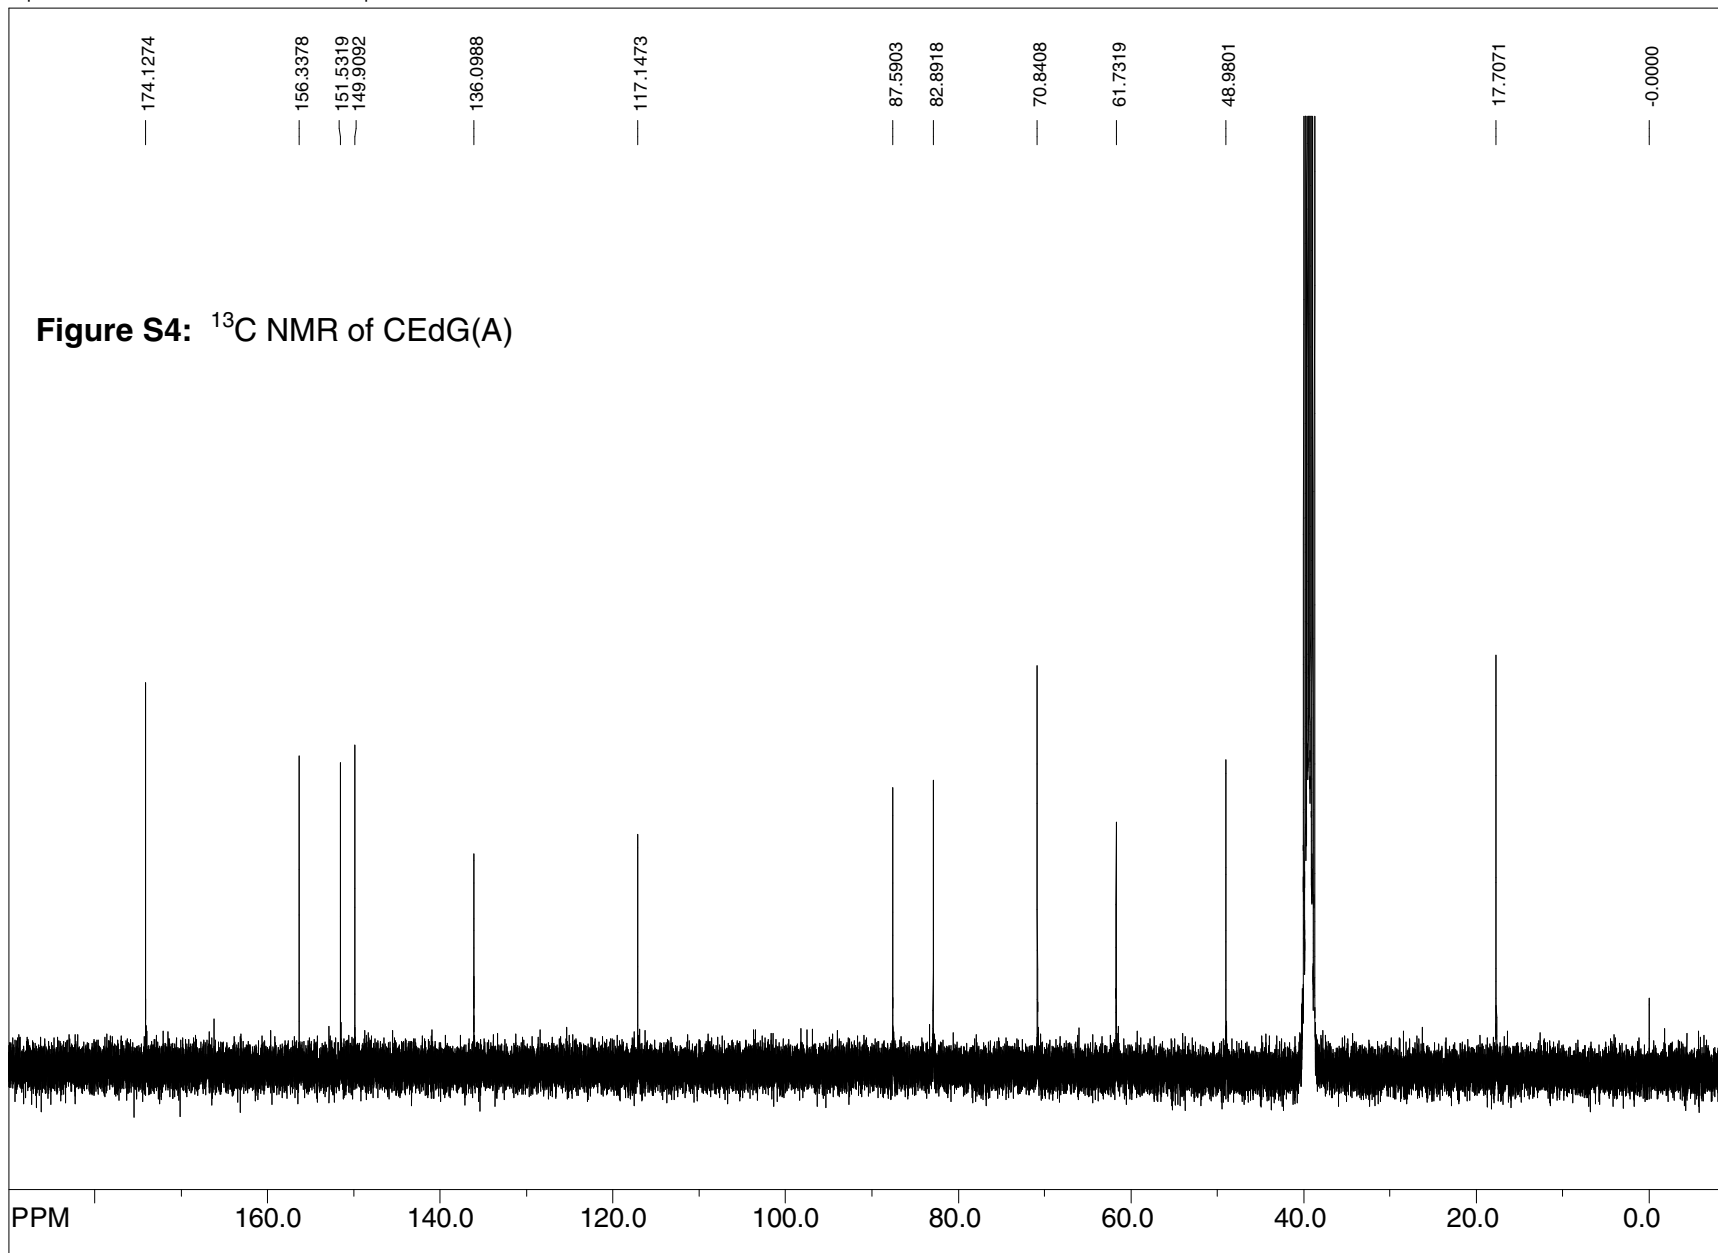

Figure S4:  $^{13}\text{C}$  NMR of CE dG(A)

file: C:\GWFiles\Research\InstrumentationAndEquip\NMR\Flower\NMRData\CEdG\_13C\_032808\auto\_2008.03.24\_01\0001.fid\fid\_block# 1 expt: "s2pul"  
transmitter freq.: 100.541493 MHz  
time domain size: 63750 points  
width: 24509.80 Hz = 243.778000 ppm = 0.384468 Hz/pt  
number of scans: 12000

freq. of 0 ppm: 100.531015 MHz  
processed size: 65536 complex points  
LB: 0.000 GB: 0.0000

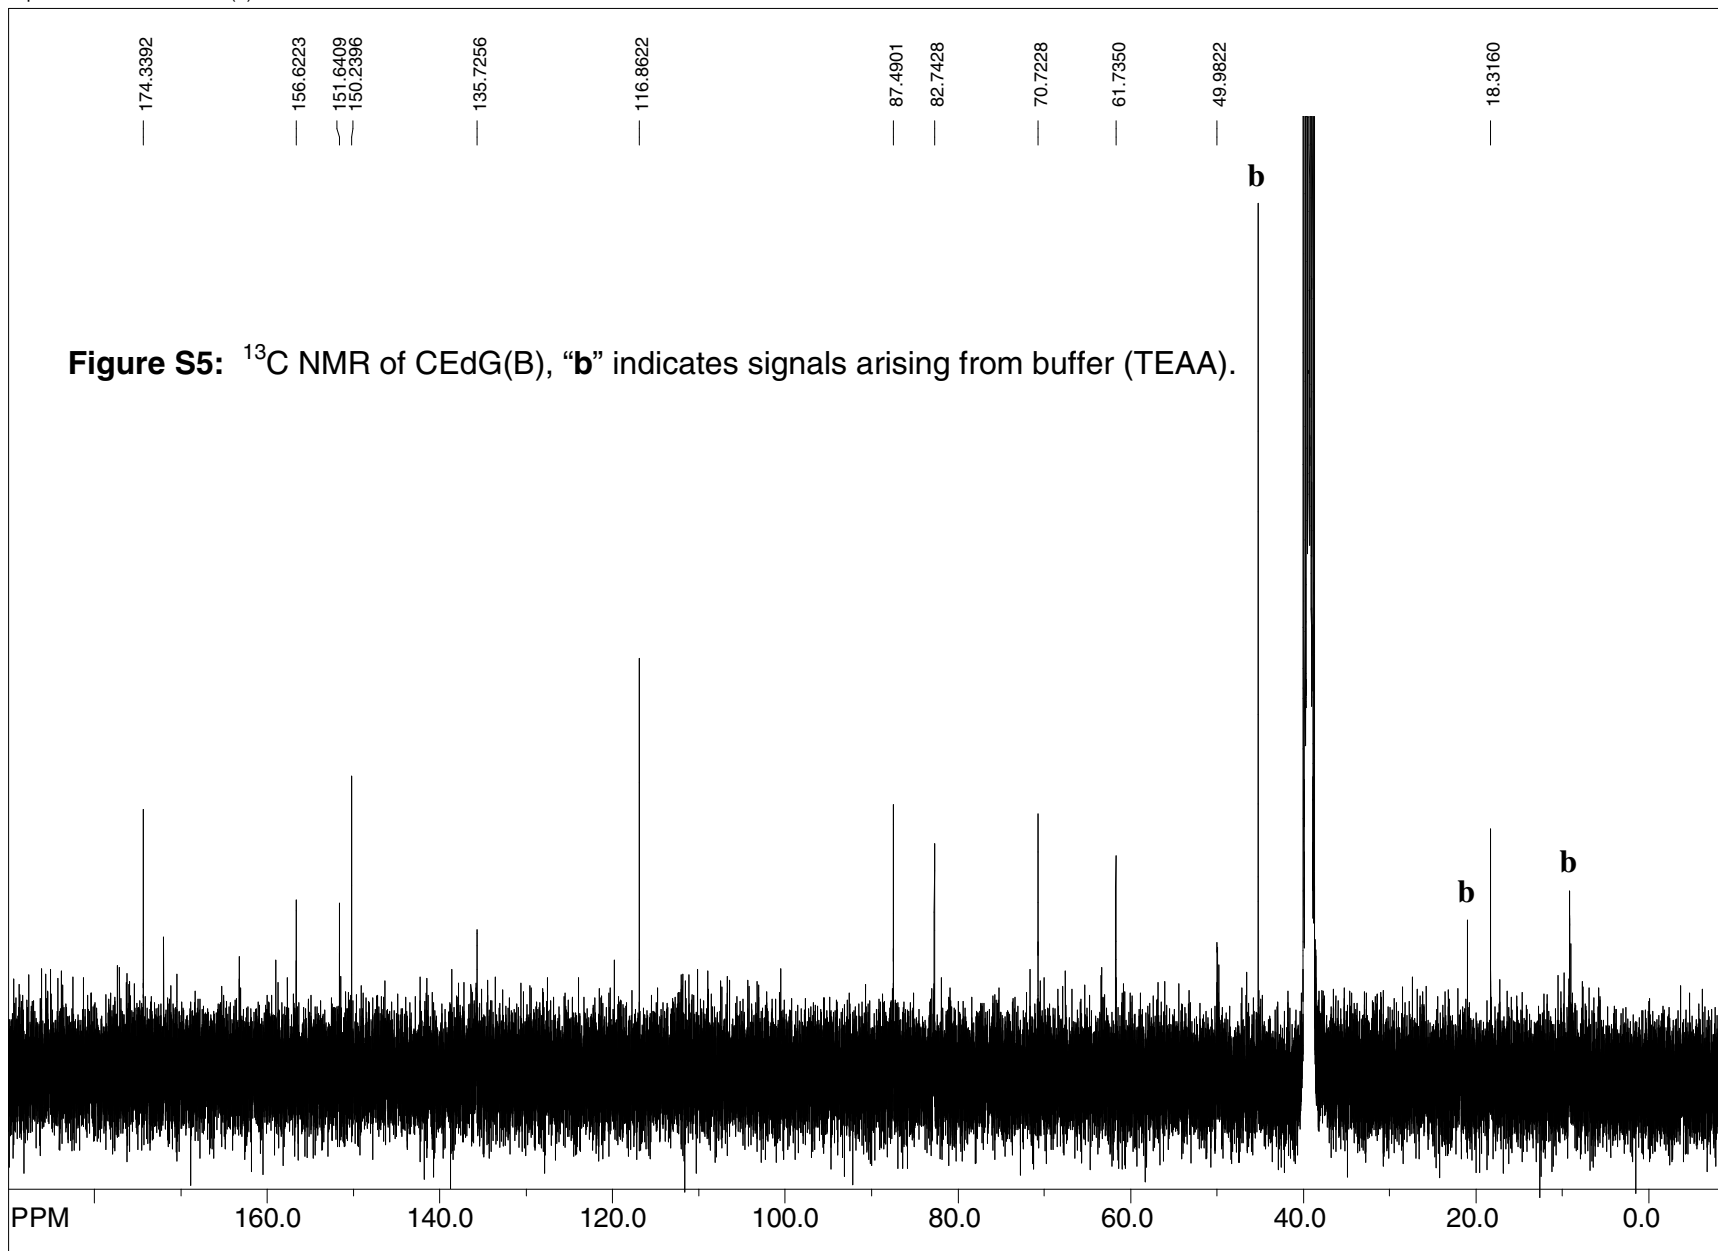

**Figure S5:**  $^{13}\text{C}$  NMR of CEEdG(B), "b" indicates signals arising from buffer (TEAA).

**Figure S6:** MS2 and MS3 of sodiated CE<sub>d</sub>G(A) parent ion obtained using the Thermo Finnigan LTQ-FT linear ion trap mass spectrometer.

gw060601ft\_04 #1-500 RT: 0.00-2.54 AV: 500 NL: 1.78E2  
 T: ITMS + p NSI Full ms3 367.00@20.00 251.00@30.00 [ 65.00-500.00]

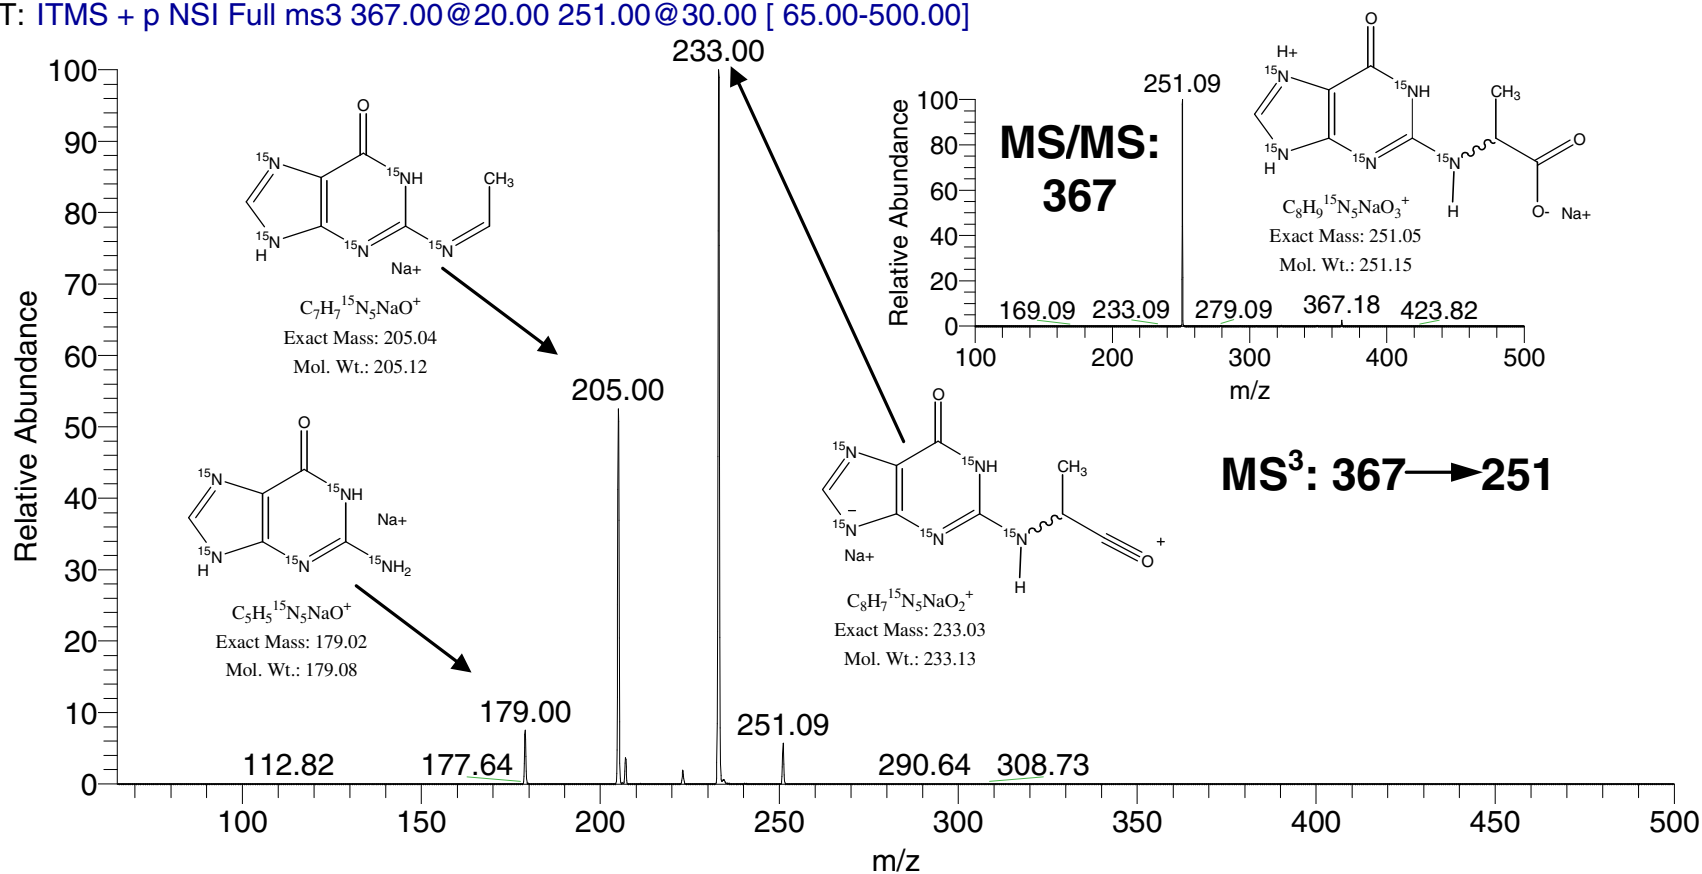

**Figure S7.** Product ion scans for CEdG (A) and  $^{15}\text{N}_5$ -CEdG(A) at  $m/z$  340 and 345, respectively, showing the daughter ions at  $m/z$  224 and 229 monitored using a Micromass Quattro Ultima Triple Quadrupole Mass Spectrometer.

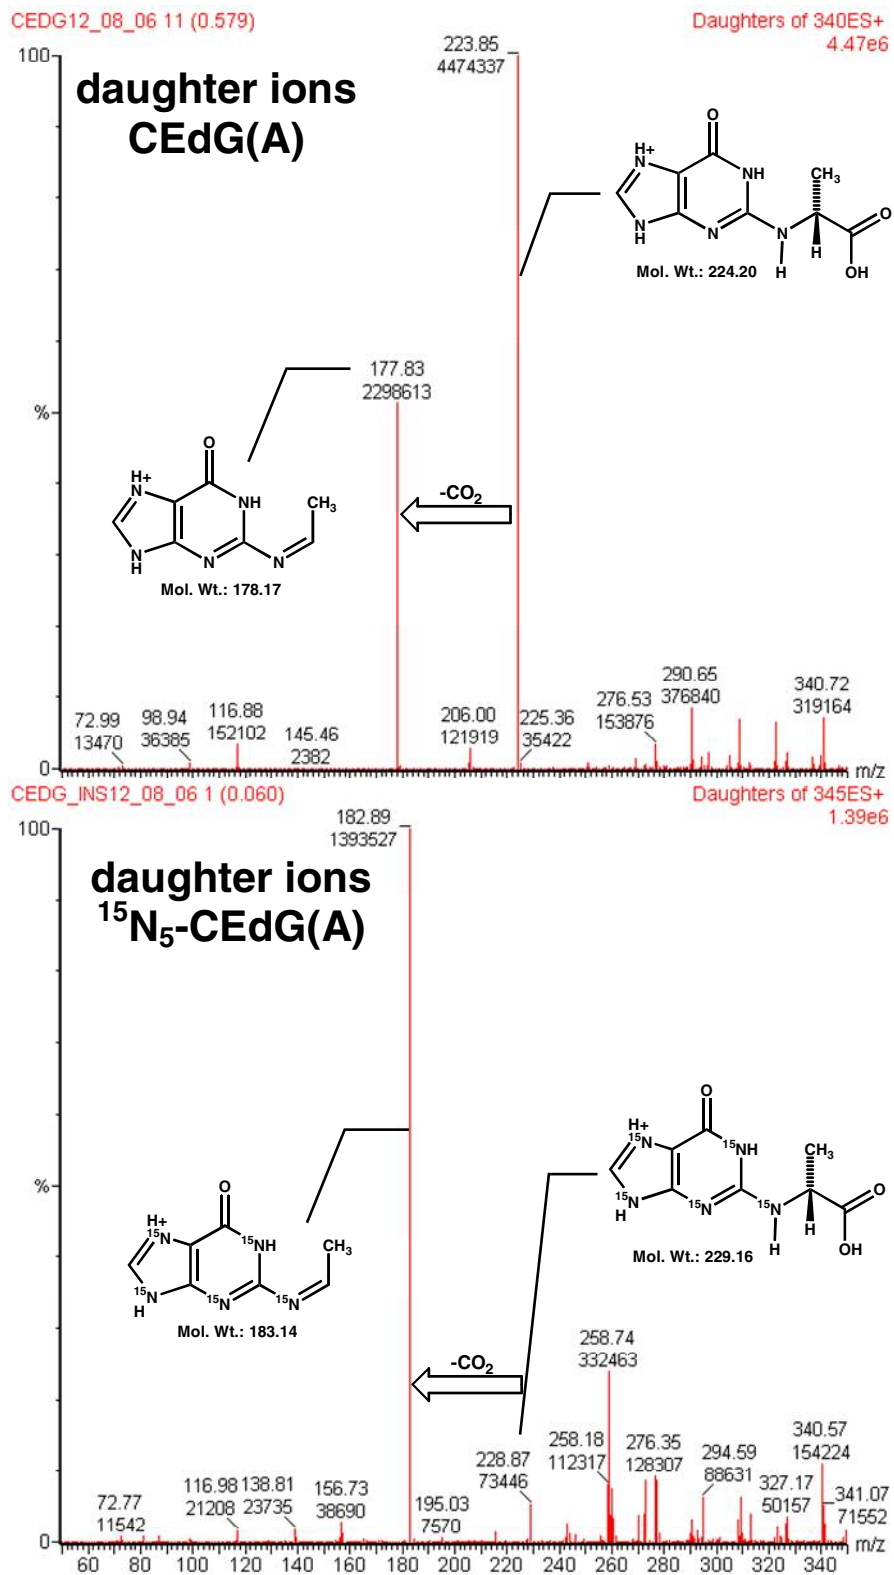



**Figure S8:** Observed isotopic distributions for  $^{15}\text{N}_5\text{-CEdG(A)}$  and  $^{15}\text{N}_5\text{-CEdG(B)}$  and the calculated isotopic distribution for  $\text{C}_{13}\text{H}_{17}^{15}\text{N}_5\text{NaO}_6$ . The latter was calculated using the Molecular Weight Calculator, V. 6.38, by Matthew Monroe, distributed as freeware at <http://www.alchemistmatt.com/>.

gw060601ft\_01 #1-500 RT: 0.00-0.98 AV: 500 NL: 7.36E4  
T: ITMS + p NSI Full ms [150.00-1000.00]

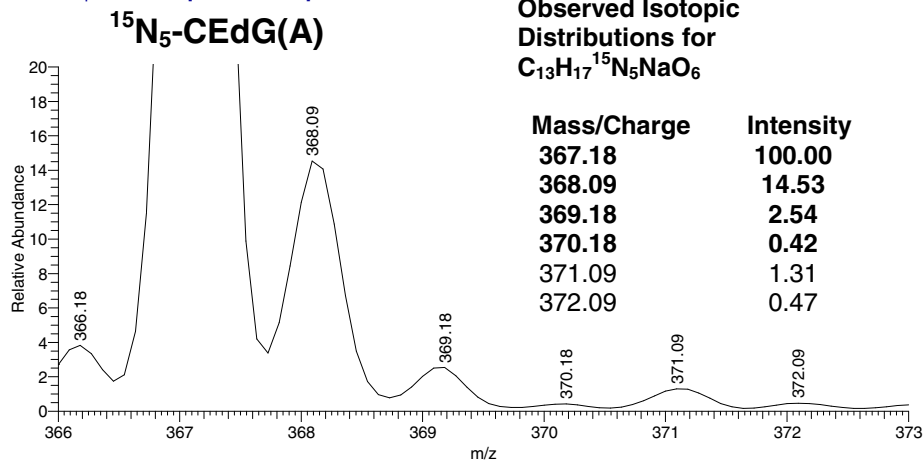

gw060601ft\_05 #1-499 RT: 0.00-0.99 AV: 499 NL: 5.72E4  
T: ITMS + p NSI Full ms [150.00-1000.00]

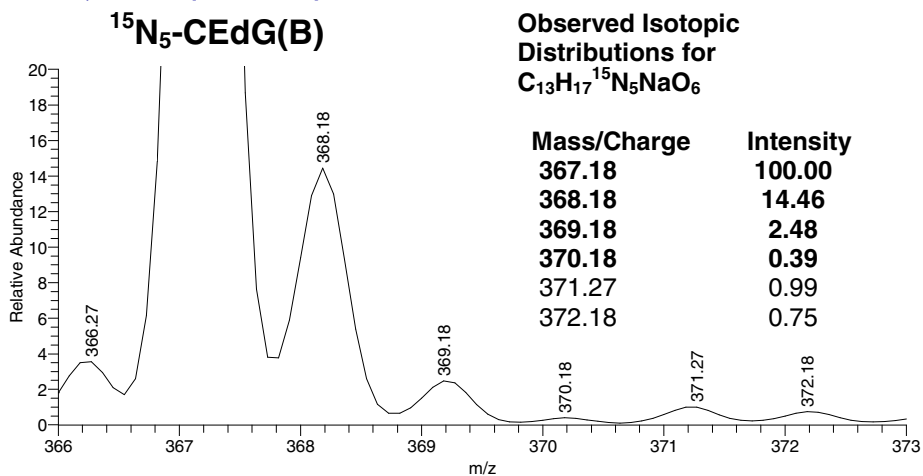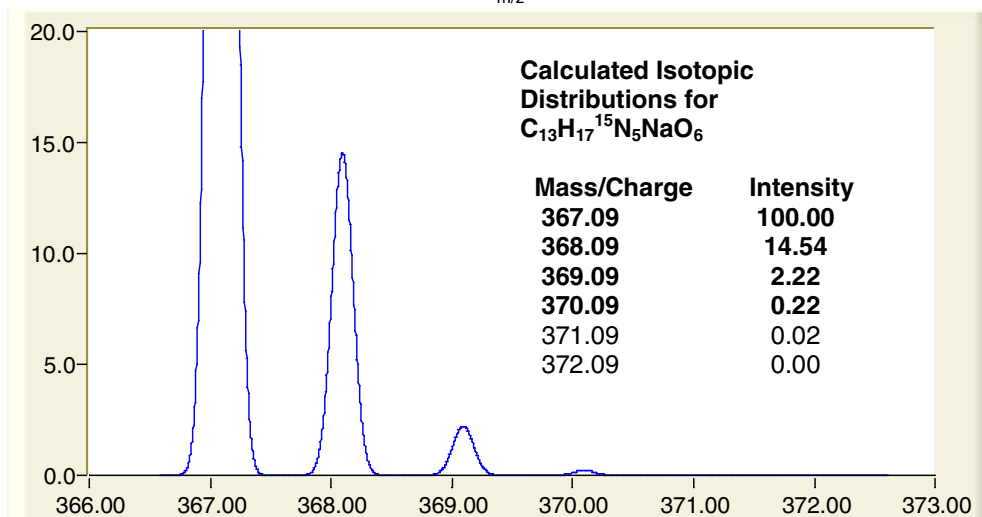

Supplement: NIHMS341652-supplement-1_si_001.pdf [file NIHMS341652-supplement-1_si_001.pdf]
